# Supplementary material for: Morphological tuning of Eu2O2S nanoparticles, manifestation of peroxidase-like activity and glucose assay use
Source: Royal Society of Chemistry journal article supplement (doi:10.1039/c5nj02705e), 2015-11-30
Supplement: c5nj02705e1.pdf [file c5nj02705e1.pdf]

## Electronic Supplementary information

### Morphological tuning of Eu<sub>2</sub>O<sub>2</sub>S nanoparticles, manifestation of peroxidase-like activity and use in glucose assay

Abhisek Brata Ghosh,<sup>a</sup> Namrata Saha,<sup>a</sup> Arpita Sarkar,<sup>a</sup> Amit Kumar Dutta,<sup>a</sup> Papu Biswas<sup>b</sup>,  
Kamalaksha Nag,<sup>\*b</sup> and Bibhutosha Adhikary<sup>\*a</sup>

<sup>a</sup>Department of Chemistry, Indian Institute of Engineering Science and Technology, Shibpur, Howrah  
711 103, West Bengal, India

<sup>b</sup>Department of Inorganic Chemistry, Indian Association for the Cultivation of Science, Jadavpur, Kolkata  
700032, India

\*Corresponding author Tel: +91-3326684561 Ext. 512, Fax: +91-3326682916,

E-mail: [bibhutoshadhikary@yahoo.in](mailto:bibhutoshadhikary@yahoo.in)

---

**Fig S1.** FTIR spectra of single source precursor complex [(Et<sub>3</sub>NH)]<sup>+</sup>[Eu(acda)<sub>4</sub>]<sup>-</sup>.

**Fig S2.** UV-vis absorption spectra of precursor complex [(Et<sub>3</sub>NH)]<sup>+</sup>[Eu(acda)<sub>4</sub>]<sup>-</sup>.

**Fig S3.** Thermogravimetric analysis (TGA) of precursor complex [(Et<sub>3</sub>NH)]<sup>+</sup>[Eu(acda)<sub>4</sub>]<sup>-</sup>.

**Fig S4.** FTIR spectra of Eu<sub>2</sub>O<sub>2</sub>S nanoplate, nanosphere and rod-like nanoparticles.

**Fig S5.** Particle size distribution plot for Eu<sub>2</sub>O<sub>2</sub>S hexagonal nanoplate.

**Fig S6.** FESEM images of Eu<sub>2</sub>O<sub>2</sub>S nanoplate: (a) low magnification, (b) high magnification  
(Inset: hexagonal morphology is obtained in FESEM analysis).

**Fig S7.** Room temperature excitation spectra of Eu<sub>2</sub>O<sub>2</sub>S nanoparticles: (a) nanoplates, (b) nanosphere, (c) nanorod-like particles.

**Fig S8.** Time dependent Uv-vis spectral changes of TMB-H<sub>2</sub>O<sub>2</sub> system catalyzed by Eu<sub>2</sub>O<sub>2</sub>S nanoplates. Inset: Change of color before and after the oxidation of TMB.

**Fig S9.** Effect of (a) pH and (b) temperature on the peroxidase like activity.

**Fig S10.** Steady-state kinetic study using the Michaelis-Menten model and Lineweaver-Burk model (insets) for commercially available  $\text{Eu}_2\text{O}_3$  by (a) varying the concentration of  $\text{H}_2\text{O}_2$  with fixed amount of TMB and (b) varying the concentration of TMB with fixed amount of  $\text{H}_2\text{O}_2$ .

**Fig S11.** The Effect of nanoparticles in the formation of hydroxyl radical with terephthalic acid as photoluminescence probe: in presence of (a)  $\text{Eu}_2\text{O}_2\text{S}$  and (b)  $\text{Eu}_2\text{O}_3$

**Fig S12.** Selectivity test in glucose detection. Bar diagram for the spectrophotometric response of TMB at 653 nm in presence of glucose oxidase for the addition of (i) 0.5 mM glucose, (b) 5 mM fructose, (c) 5 mM maltose, (d) 5 mM lactose.

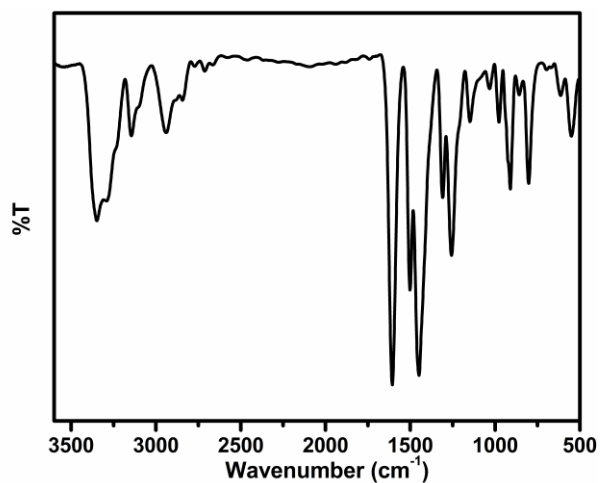

**Fig. S1**

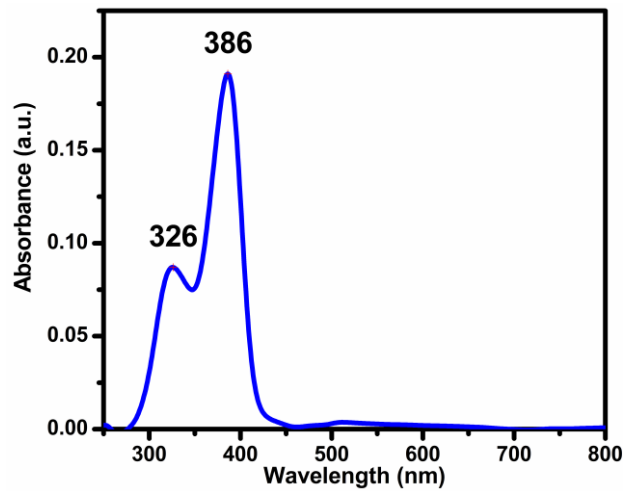

Fig. S2

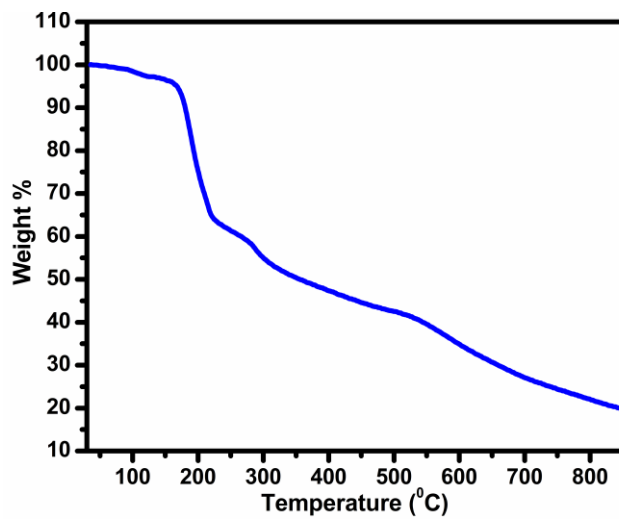

Fig. S3

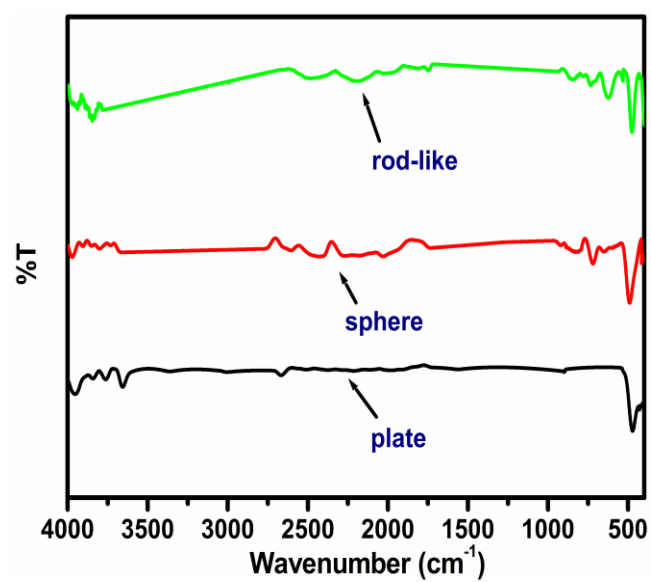

Fig. S4

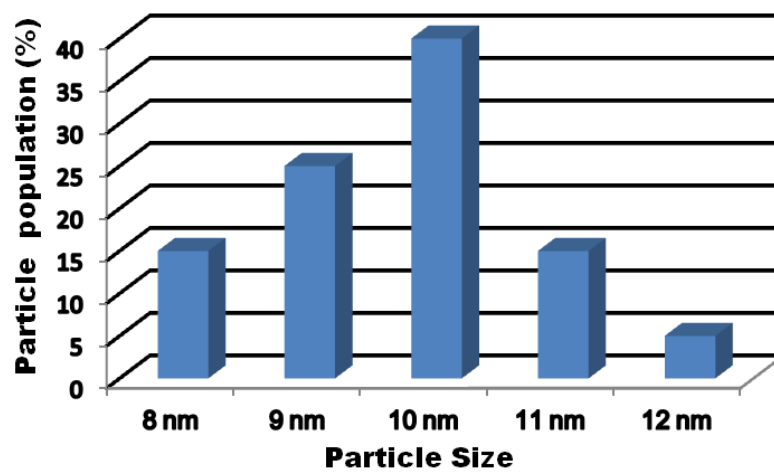

Fig. S5

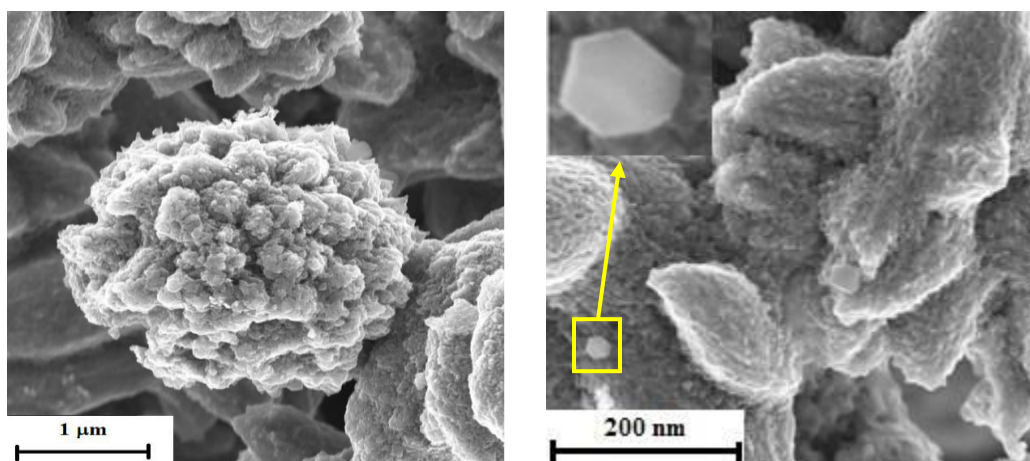

**Fig. S6**

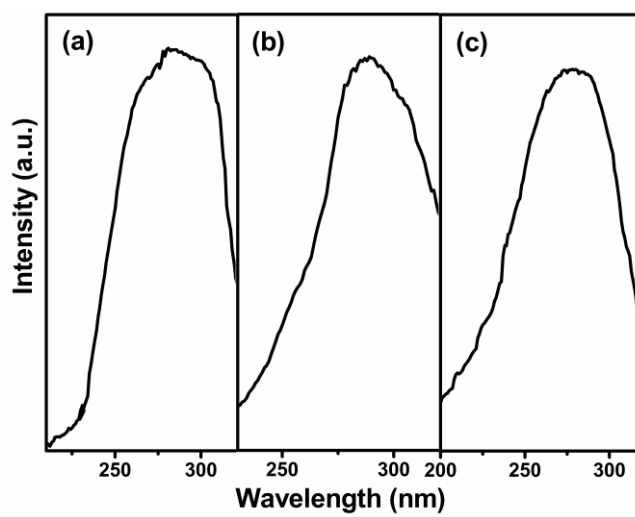

**Fig. S7**

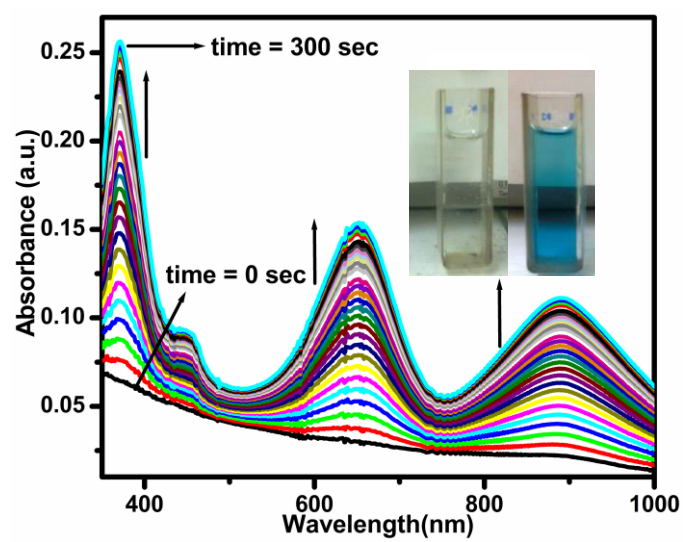

Fig. S8

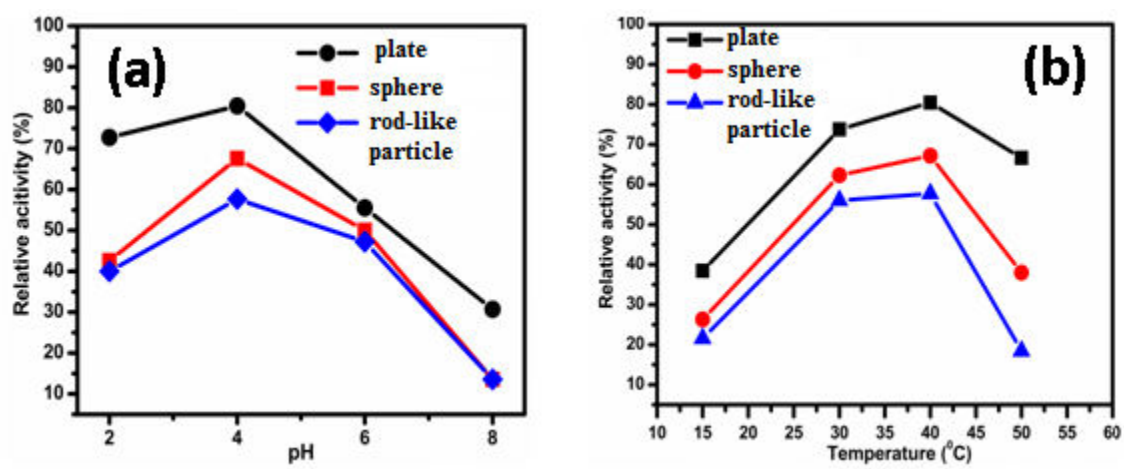

Fig. S9

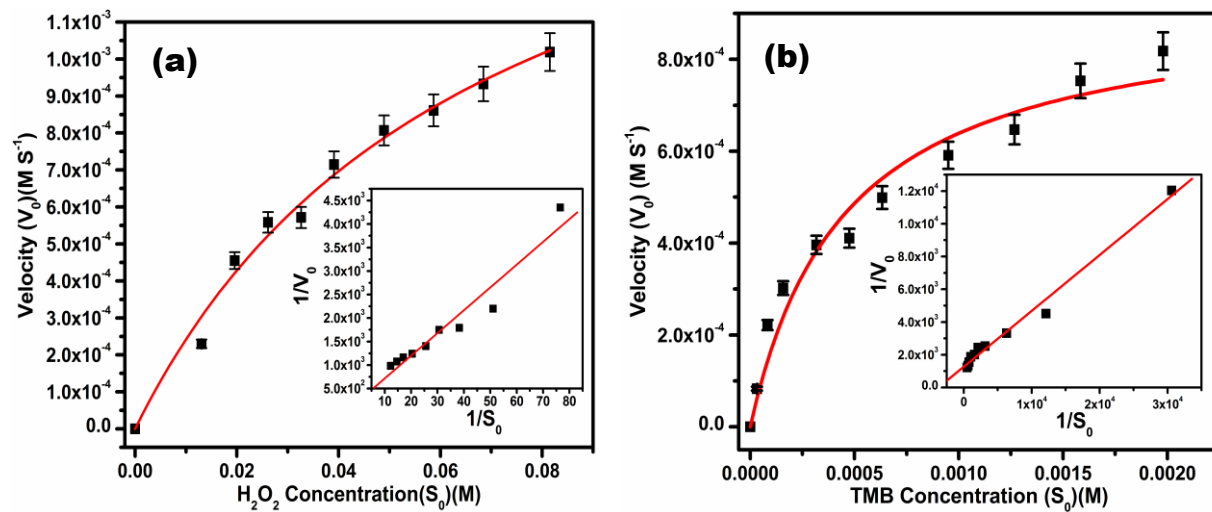

Fig. S10

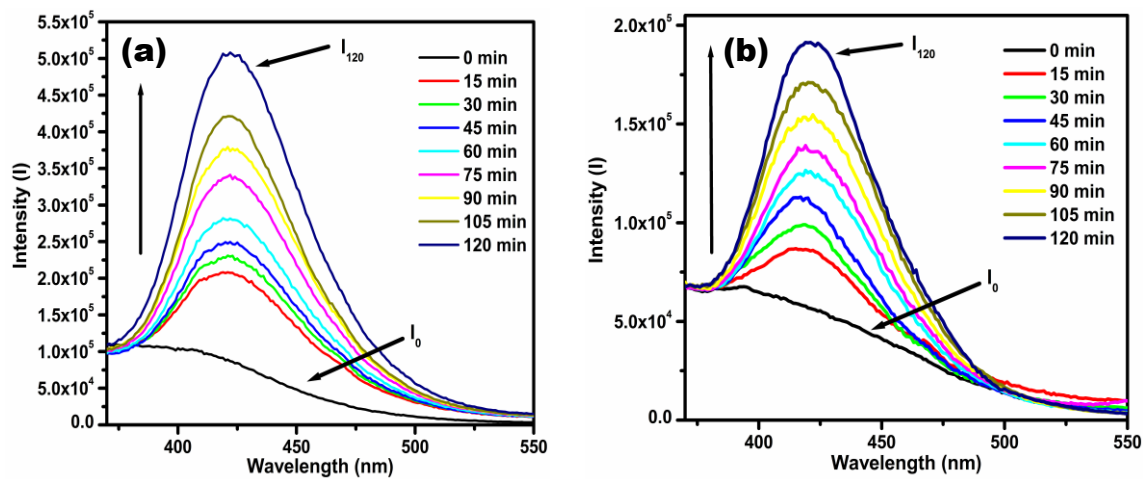

Fig. S11

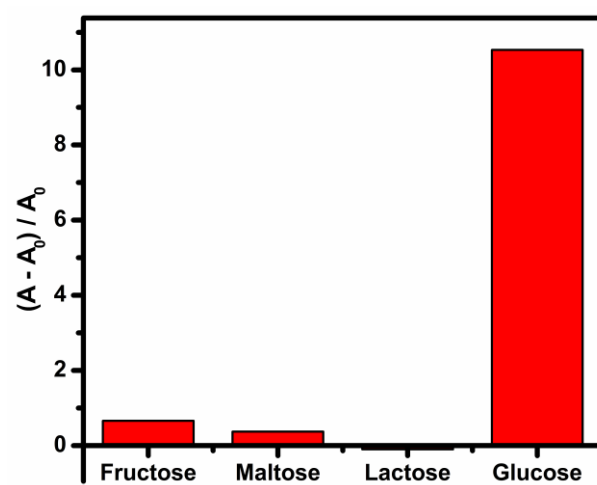

Fig. S12
